1 **A network-based analysis of signal use during approach interactions across**  
2 **sexes in chacma baboons (*Papio ursinus griseipes*)**

3 **Jana Muschinski<sup>1</sup>, Alexander Mielke<sup>2,1</sup>, Susana Carvalho<sup>1,3,4</sup>**

4 <sup>1</sup> *Primate Models for Behavioural Evolution Lab, School of Anthropology and Museum*  
5 *Ethnography, University of Oxford, Oxford, UK*

6 <sup>2</sup> *School of Psychology and Neuroscience, University of St Andrews, St Andrews, UK*

7 <sup>3</sup> *Gorongosa National Park, Sofala, Mozambique*

8 <sup>4</sup> *Interdisciplinary Center for Archaeology and Evolution of Human Behaviour (ICArEHB),*  
9 *Universidade do Algarve, Faro, Portugal*

10

11 **Abstract**

12 Greetings in primates fulfil important functions including navigation of rank, maintenance of  
13 social relationships, and potentially establishing coalition partnerships. *Papio* makes a  
14 particularly valuable study genus as baboons show variation in greeting, male-male cooperation,  
15 philopatry, and social system. However, baboon greeting research has largely focused on male-  
16 male interactions, with female approach behaviour neglected except in relation to friendships and  
17 grunting. Most if not all signals seen in male-male greetings are also present in approaches  
18 between other sex combinations. To understand these signals further, their use in all sex  
19 combinations should be explored. We investigated approaches between male and female adult  
20 chacma baboons (*Papio ursinus griseipes*), the only savannah baboon reportedly lacking male-

21 male cooperation, recorded in Gorongosa National Park, Mozambique. We compared male-male  
22 greetings with those of other baboon species, identified network clusters of co-occurring signals,  
23 and compared male and female approaches more broadly. Male-male approaches were similar to  
24 those in other baboon species. We identified several predictable signal combinations, ear-  
25 flattening with lip-smacking being a particularly strong signal of benign intent across sexes.  
26 Further research comparing greeting across sex combinations and species will help disentangle  
27 links between risk, cooperation, and greeting behaviour.

28 **Keywords:** greeting, proximity behaviour, grunting, lip-smacking, ear-flattening

## 29 **1 Introduction**

30 Baboon greeting behaviour, studied extensively for over five decades, has recently received  
31 renewed interest due to the study of Guinea baboons, which exhibit highly physical and frequent  
32 male-male greetings compared to other baboon species [1]. Greetings between adult male  
33 baboons, which are potentially high-risk due to close physical contact, may be related to the  
34 formation and testing of coalitions, and may have deeper implications for the evolution of  
35 ritualized behaviour and cooperation, male tolerance, and sexual dimorphism across *Papio* [2].  
36 In baboons, “greeting” refers to male-male approaches which involve some combination of a  
37 swaggering gait, ear-flattening, lip-smacking, presenting, and, depending upon species, physical  
38 contact behaviours including mounting, hip grasping, and genital touching [1–4]. Any further use  
39 of the term “greeting” will refer only to these types of male-male encounters, in line with  
40 preceding literature. We will use the terms “approaches” and “approach behaviour” more

41 broadly because we address all sex combinations and wish to avoid conflation between context  
42 and potential function.

43 Approach behaviour in other sex combinations remains relatively unexplored, with the exception  
44 of female grunting behaviour and its relevance for “friendships” [5–8]. Many behaviours  
45 described in male greetings are also present in approaches involving females, including  
46 presenting, hindquarter touches, mounting, ear-flattening, and lip-smacking, yet sex  
47 combinations are usually analysed separately and rarely compared [9,10]. Studies which have  
48 included females have focused on single behaviours such as hindquarter presentations [9] or  
49 vocalizations [11]. Furthermore, existing greeting literature has focused on the presence or  
50 absence of individual behaviours or signals, rather than the usage and meaning of signal  
51 combinations. Together these issues have resulted in a poor understanding of how specific these  
52 signals and their combinations are to male-male encounters and to certain *Papio* species. Failing  
53 to understand these nuances makes it difficult if not impossible to address larger evolutionary  
54 and communication questions.

55 “Greeting” in itself is a problematic term as it implies the function of “saying hello”, when it is  
56 often difficult to differentiate between signals performed upon arrival that may have specific  
57 meanings (e.g., initiate grooming) and those specific to the function of greeting [12]. Across non-  
58 human primates, signals used during encounters between individuals or during merging of  
59 groups have been studied in chimpanzees, mantled howler monkeys, baboons, Tonkean  
60 macaques, sooty mangabeys, grey mouse lemurs, and black-and-white colobus monkeys, among  
61 others [11–24]. Much of the literature focuses on interactions between approaching or passing  
62 individuals, with a variety of potential underlying goals including affiliation, infant access,

63 prevention of aggression, or reconciliation [17,20,23–25]. Accordingly, the effects of rank, social  
64 relationships, familial ties, and recent interaction history differ across studies. A second subset  
65 focuses on interactions after separation, whether these be group-level, for example the  
66 reunification of two subgroups, or individual interactions following fusion events [14,21,23].  
67 The collections of signals used in an encounter can be visual, vocal, tactile, or bi/multi-modal  
68 [12].

69 In baboons, higher rates of physical greeting, particularly high-risk physical greetings, are  
70 correlated with increased male coalitionary behaviour and spatial tolerance, with chacma  
71 baboons being the non-coalition forming outlier [2]. It has been suggested that baboon greeting  
72 may be an example of ritualized behaviour and that there is a link between presence and intensity  
73 of male-male greetings and social system, degree of sexual dimorphism, and male-male  
74 competition [2,26–28]. In humans, rituals may enhance social cohesion, reduce competition, and  
75 enforce adherence to normative values [2,29–31]. The fossil record indicates that strong  
76 evolutionary parallels exist between papionines and hominins, having faced similar adaptive  
77 challenges during their parallel periods of expansion and dispersal across Africa during the  
78 Pliocene [32]. It is possible that similar adaptations, including those relating to cooperation and  
79 social cohesion, could have allowed both clades to succeed in novel and changing environments.

80 The high level of variation in social structure, male-male relationships, cooperation, sexual  
81 dimorphism, and socioecology in the *Papio* genus provides an ideal natural experiment to study  
82 relationships between these factors. Six species of baboon currently range through a variety of  
83 environments across Africa and the Arabian Peninsula (*P. hamadryas*, *P. papio*, *P. anubis*, *P.*  
84 *cynocephalus*, *P. ursinus*, *P. kindae*), with several hybridization zones [33,34]. Their

85 environments vary drastically between and within species, which may influence signalling  
86 repertoire and frequency [35,36]. While sexual dimorphism across *Papio* is relatively high in  
87 comparison to other genera, chacma baboons are noticeably more dimorphic in canine height  
88 than the other *Papio* species and hover at the high end of spectrum of male to female body mass  
89 ratios in the genus (see table 1.1) [37–39]. Understanding how males navigate interpersonal  
90 relationships, particularly in species with intense competition, is critical for studying  
91 relationships between behaviour, male competition, social structure, and the evolution of sexual  
92 dimorphism. Differing levels of sexual dimorphism may alter perceived risk levels in approaches  
93 between different sex combinations across the *Papio* species, resulting in differences in signal  
94 use. Conversely, an improved understanding of communication in close-range interactions across  
95 sex combinations may provide further insight into how such interactions may shape and facilitate  
96 relationships which in turn affect reproductive success.

97 The four “COKY” baboons (chacma, olive, Kinda, and yellow baboons) all exhibit multi-male,  
98 multi-female groups with polygynandrous mating systems, female philopatry, and male dispersal  
99 [40]. Male coalitions have been reported consistently across all COKY baboons except the  
100 chacma baboon [40,41]. Limited male coalitionary behaviour was observed in one male-male  
101 pair of chacma baboons by Saayman [42] and reported in chacma baboons in Gorongosa  
102 National Park during hunting activity (personal communication, Susana Carvalho), suggesting  
103 under-reported variation. Unlike the COKY baboons, Guinea and hamadryas baboons exhibit  
104 multi-level hierarchical social structures. In both species, males are philopatric, remaining in  
105 their natal clan/party, while females disperse from their natal groups [43,44]. Unlike hamadryas  
106 baboons, male Guinea baboons demonstrate strong bonds with other males, with high levels of

107 male – male tolerance and affiliative behaviours such as grooming, even between less closely  
 108 related males [45].

109 Table 1.1: Greeting behaviour, philopatry type, and sexual dimorphism across *Papio*

| Species          | Greeting exhibited     | Physical contact | Philopatry Type         | M-M Coalitions      | Canine Height (M:F) [37, 38, 39, 43, 80] | Body Size (M:F) [37, 38, 39, 43, 80] |
|------------------|------------------------|------------------|-------------------------|---------------------|------------------------------------------|--------------------------------------|
| chacma baboon    | Contested [10, 42, 50] | Unknown          | Female [40, 41, 42, 83] | No [40, 41, 42, 83] | 3.84                                     | 2.01                                 |
| yellow baboon    | Yes [9, 84]            | Unknown          | Female [40, 41, 83]     | Yes [40, 41, 83]    | 2.80                                     | 1.76                                 |
| kinda baboon     | Unknown                | Unknown          | Female [81]             | No [81]             | 3.00 [81]                                | 1.77 [81]                            |
| olive baboon     | Yes [46]               | Rare [46]        | Female [40, 41, 83]     | Yes [40, 41, 83]    | 2.22                                     | 1.53;<br>1.85;<br>1.81; 1.89         |
| hamadryas baboon | Yes [3, 47, 84]        | Rare             | Male [3, 47, 84]        | Yes [40, 41, 83]    | 2.74                                     | 1.84;<br>1.78; 1.71                  |
| Guinea baboon    | Yes [1, 27]            | 93.40%           | Male [43]               | Yes [40, 41, 83]    | 3.14                                     | 1.7                                  |

110 Greetings occur in hamadryas and Guinea baboons, and at a lesser rate, yellow and olive  
 111 baboons [1,9,46,47]. The most ritualized and physical of greetings are exhibited by Guinea  
 112 baboons; more varieties of physical contact are exhibited and physical contact is generally more  
 113 frequent, intense, and risky than in the other species [1,2,27]. Greetings take on a variety of  
 114 functions in male baboons, at times dependent upon the species, and may assist with in-group  
 115 identification, bond testing, and relationship reinforcement (Guinea baboons) [1,27], test  
 116 potential for coalitions (olive baboons) [46], or ease tension and avoid confrontation through  
 117 signalling of competitive power (hamadryas baboons) [3,47,48]. Systematic study of greeting in

118 chacma baboons is limited (Tables 1.1 and 3.2), despite the importance of chacma baboons when  
119 studying relationships between greeting behaviour, coalitionary behaviour, and sexual  
120 dimorphism [10,41]. They are generally reported as exhibiting limited greeting behaviour, with  
121 little to no physical or high-risk (i.e., genital) contact [2,10,49]. While chacma baboons do  
122 exhibit some of the less intense greeting behaviours reported in other species, close proximity  
123 approaches by male chacma baboons, whether towards a recipient adult male or adult female, are  
124 more likely to happen without greeting behaviour than with and physical contact is rare  
125 [10,42,50]. Given their status as a potential outlier among *Papio* species, further systematised  
126 research on chacma greeting behaviour would be a valuable addition to the literature.

127 While most female baboon approach behaviour has been understudied, grunting is the exception  
128 [6,7,51]. Suggested functions of grunting include signalling benign intent, reinforcing social  
129 bonds, indicating high arousal, and reconciling following agonistic interactions [52,53]. Across  
130 baboon species, grunting is more common when infants are present and may be dependent on  
131 social bond strength and familial relationship [53]. Grunts may be used in a reconciliatory  
132 context and interactions following grunting are less likely to be agonistic and more likely to  
133 involve infant contact [5,51,52]. Differences in methodology between the female grunting and  
134 male greeting literatures make direct comparison between different sex combinations difficult. A  
135 more encompassing view of baboon approach behaviour would contribute significantly to our  
136 understanding of the signals used during approaches, how signals are combined, and how their  
137 use relates to the sex and goals of approacher and recipient.

## 138 **1.1 Reconsidering baboon “greeting”**

139 We find that there are three primary issues at play in the existing *Papio* approach literature. First,  
140 the study of greetings does not consider females and how the same signals are used in  
141 approaches between other sex combinations. Second, there is insufficient data on chacma baboon  
142 approach behaviour and limited understanding of within-species variation. Third, much of the  
143 existing approach behaviour and greeting literature in baboons focuses on the presence and  
144 absence of individual signals, rather than considering how signals are combined. This is an issue  
145 across the primate literature more broadly and makes it difficult to identify how multi-modal  
146 signalling is composed and how small differences in composition modify meaning [12,54]. In  
147 chimpanzees, for example, the likelihood of a reciprocal greeting is strongly influenced by the  
148 modality of the initial greeting [19].

149 Here, we study approach behaviour in male and female chacma baboons (*P. ursinus griseipes*)  
150 using video footage from Gorongosa National Park, Mozambique. Rather than focusing solely on  
151 interactions where “greeting behaviours” were exhibited, we record proximity events (any  
152 instance in which an individual comes within two meters of a conspecific after having previously  
153 been more than five meters away [similar approach as in 10]). Use of this broader criterion and  
154 video footage rather than *in situ* observation allows for investigation of why such behaviours are  
155 exhibited in some approaches, but not others, and prevents the accidental exclusion of subtle  
156 behaviours which may be missed upon first – or live – viewing. The study has three primary  
157 objectives – to provide first, a further account of male-male approach behaviour in chacma  
158 baboons and situate this within the existing literature; second, to look at how signals are used in  
159 combination using a network approach; and third, to conduct a direct comparison of the signals



160 used in the different sex combinations, assessing how specific to male-male approaches the use  
161 of the aforementioned “greeting” signals truly are.

162 We primarily applied a network analysis approach to study co-occurrence of signals across  
163 varying conditions using the NetFACS package [55], originally designed for the study of  
164 complex facial signals. Taking a network approach allows us to study the relationship between  
165 signals themselves and between signals and specific conditions, providing a greater degree of  
166 insight into the structure of approach behaviour. Each signal is treated as a network node, with  
167 network edges determined by behaviour co-occurrence [55,56]. We additionally used the  
168 package’s permutation test functionality to test predictions regarding differences in behaviour  
169 prevalence between sex combinations.

170 Our study aims to address the following research questions and accompanying predictions.

171 1. **Research Question:** How do male-male approaches in Gorongosa chacma baboons  
172 compare to the published literature?

173 **Prediction:** Based on the existing literature, we would expect chacma baboons to show  
174 little to no contact behaviour, particularly intense contact, in male-male approaches when  
175 compared to other baboon species.

176 2. **Research Question:** Are there specific signals which happen together more than expected  
177 and do they represent different approach “types”?

178 **Prediction:** We expect to identify signal clusters that may be tied to specific sex  
179 combinations or be related to specific goals (e.g., gaining infant access or receiving  
180 grooming).

181 3. **Research Question:** How does the combination of approacher and recipient sex influence  
182 the signals and combinations thereof exhibited during approach? Are any of the  
183 behaviours which are frequently discussed in the male-male literature specific to male-  
184 male approaches? These behaviours include lip-smacking, ear-flattening, presenting,  
185 mounting, and hindquarter touching.

186 **Prediction:** We predict that sex combination influences the signals expected, with  
187 identifiable male-male versus female-female signals, but that most signals will show  
188 overlap in usage. We expect the aforementioned behaviours may be more common than  
189 expected in male-male encounters.

## 190 **2 Methods**

### 191 **2.1 Study site and population**

192 Gorongosa National Park covers 3770 km<sup>2</sup> of the Urema drainage basin in the southern end of  
193 the East African Rift System (EARS) [57–60]. The mosaic ecosystem results in high biodiversity  
194 and makes the park a unique and valuable analogue model for the environmental conditions of  
195 the EARS during important periods of human evolution [57,61,62]. The park's baboons are  
196 usually categorized as chacma baboons (*Papio ursinus griseipes*), but the park lies within a  
197 potential hybridization zone between northern chacma baboons and southern yellow baboons  
198 [59,63]. Our study group, the Chitengo Troop, resides in the forested area surrounding the tourist  
199 site and research centre and is well habituated due to continuous exposure to humans. As of  
200 November 2019, the troop consisted of 8 resident adult males, 3 peripheral adult males, 1

201 subadult male, 11 adult females, 1 subadult/large juvenile female, approximately 15  
202 small/medium juveniles, and an indeterminate number of infants. All adult and subadult baboons  
203 were identified and named by JM in 2019 and can successfully be identified *in situ* and from  
204 sufficiently high-resolution video footage. Sixty-five hours of footage were recorded  
205 opportunistically during October and November 2018 and between July and November 2019 by  
206 colleague Lucy Baehren and JM [64]. Recording focused on groups of baboons, with target  
207 group rotated throughout the day, but was not randomized as individuals had not been identified  
208 at the time of recording. Approacher identity was controlled for *post hoc*. Video recording in  
209 Gorongosa National Park was completed under permit number PNG/DSCi/C145/2019 (J.  
210 Muschinski) and PNG/DSCi/C110/2018 (L. Baehren) and was cleared by the University of  
211 Oxford Animal Welfare and Ethical Review Board (APA/1/5/ACER/10Dec2018).

## 212 **2.2 Video coding procedure**

213 Footage was reviewed *post hoc* and all proximity events identified. Proximity events are here  
214 defined as any instance in which one individual, the approacher, decreases the distance between  
215 themselves and the recipient from over five meters to less than two meters. The proximity event  
216 began once the approacher entered a five-meter radius of the recipient and concluded when either  
217 1) the approacher or recipient increased the distance between each other to over five meters or 2)  
218 30 second had passed since the approacher came within two meters of the recipient. In most  
219 cases, the approacher could be easily identified, with one individual approaching and the other  
220 remaining stationary. If both approached each other, the individual who began approaching first  
221 was considered the approacher. Where an individual approached more than one stationary  
222 individual, the recipient was defined as the individual who the recipient interacted with or

223 signalled towards first. If neither individual was interacted with, the first individual the  
224 approacher passed was considered the recipient. Two individuals simultaneously approaching a  
225 third occurred very rarely and in such situations the individual who came within two meters of  
226 the recipient first was considered the approacher. Juveniles were not included in these analyses  
227 because only adults and subadults could be reliably identified and identification is necessary to  
228 control for potential effects of individual relationships. Events were only included if over 50% of  
229 the entire sequence could be seen. The ethogram used to collect behavioural data was modelled  
230 primarily after Dal Pesco & Fischer [1], Colmenares [65], and Silk [66] (for full ethogram see  
231 [67]). The cleaned dataset is publicly available [68]. Behavioural data was collected using  
232 BORIS version 7.10.2 [69] and data cleaning and analysis performed using Python version 3.8.5,  
233 R version 4.2.2, and NetFACS version 0.5.0.

234 For analyses using NetFACS (sections 2.4 and 2.5) we included only proximity events where  
235 visibility allowed for identification of the approacher's general facial expressions (e.g., lip-  
236 smacking) and where both individuals were adults or subadults ( $n = 341$ ). Future analyses will  
237 focus on outcomes of these interactions and the behaviour of the recipient; this paper focuses  
238 specifically on the description and identification of patterns or combinations of signals exhibited  
239 by the approachers. We include only actions performed by the approacher during the approach  
240 and initial interaction. The initial interaction is defined as ending once the approacher sits or  
241 begins walking away, foraging, grooming, resting, or being groomed. NetFACS, used for  
242 permutation tests and network analysis, requires presence/absence data for each signal of interest  
243 for each event and does not account for the order, intensity, count, or length of each behaviour. It  
244 compares observed probabilities to expected probabilities created using bootstrapping [55]. Prior

245 to analysis we combined several similar behaviours which had been split too finely during  
246 ethogram creation (e.g., combining all non-contact threats into one category, combining all types  
247 of embraces, etc.) into larger behaviour groups and we excluded any behaviours which occurred  
248 in fewer than four events (1% of events) [55,70].

### 249 **2.3 Male-male “greeting” analysis**

250 To enable comparison with existing literature [2], all male-male proximity events were classified  
251 as either “non-greetings” or “greetings” based on the presence of any traditional “greeting  
252 behaviour” (lip-smacking, ear-flattening, continued direct gaze, physical contact). All proximity  
253 events that could be defined as “greetings” were then assessed on three criteria - presence of any  
254 physical contact (initiated by approacher or recipient), presence of intense physical contact  
255 (initiated by approacher or recipient), and reciprocation. Intense physical contact has previously  
256 been defined as genital touching, embracing, or mounting [1,27]. Greetings were scored as  
257 “reciprocal” when the approacher and recipient both perform at least one greeting behaviour  
258 [1,3]. Percentages of greetings that were physical, intense, or reciprocal were calculated in  
259 relation to the count of male-male “greetings”, rather than in relation to all male-male proximity  
260 events, to allow for direct comparison with the literature. It should be noted here that the total  
261 number of male-male greetings reported across the 65 hours of video footage cannot be directly  
262 compared to hourly rates reported elsewhere due to differences in methodology (opportunistic  
263 videography vs. focal follows). We calculated bootstrapped 95% confidence intervals using the  
264 boot R package [71].

## 265 **2.4 Identification of signal combinations - community detection**

266 To determine whether types of greeting can be identified without additional information (e.g.,  
267 approacher sex), we applied community detection using the NetFACS package with a modularity  
268 threshold of at least 0.3 [55,72]. NetFACS community detection uses the “fast greedy”  
269 modularity optimization algorithm to determine which groups of elements co-occur more than  
270 expected [55]. We completed this analysis twice – once with the dataset as prepared, with a quite  
271 extensive ethogram in which behaviours are included independently (35 behaviours), and once  
272 with a minimal ethogram, where behaviours are collapsed into a total of 25 categories (e.g., all  
273 types of non-maternal infant contact lumped as “infant contact,” all types of non-aggressive  
274 contact lumped into one category, etc.; see [67]). Each was run with 2000 randomizations, a  
275 minimum significance of 0.05, minimum count of 17 (5% of 341 observations), and minimum  
276 probability of 0.05. Full results of the minimized ethogram analysis are discussed below.

277 To determine whether these signal combinations were associated with specific sex combinations  
278 or whether the combining of all sex combinations into one analysis hid sex-specific patterns, we  
279 split the dataset into the four sex combination categories (male-male, female-female, female-  
280 male, and male-female) and completed the same analysis for each subset using the minimized  
281 ethogram. Minimum count cut-offs were adjusted for the subsets sample sizes. Graphical results  
282 for analyses of the expanded ethogram and for the four sex combination subsets are included in  
283 the supplementary information.

## 284 **2.5 A comparison of the specificity of “greeting” behaviours to male-male** 285 **approaches**

286 We compared the use of five signals identified in most male-male greeting ethograms (lip-  
287 smacking, ear-flattening, mounting, presenting, and hindquarter touches) between male-male  
288 approaches and the other sex combinations to determine whether any of these signals or their  
289 combinations are specific to male-male approaches. For these analyses we compared observed  
290 probabilities for each behaviour or combination of interest in male-male events to the expected  
291 probability calculated from a permutation of all events (randomizations = 1000) using the full  
292 ethogram with the NetFACS package. We included a random effect of approacher ID and we  
293 controlled for presence of an infant not belonging to the approacher. An alpha value of 0.01 was  
294 used to account for multiple comparisons. We repeated the same analysis across the remaining  
295 sex combinations (female-female, male-female, female-male).

## 296 **3 Results**

297 A total of 428 interactions were identified from 65 hours of video footage, with 341 meeting all  
298 visibility inclusion criteria (see table 3.1). The approacher was identifiable in all but 19 of the  
299 qualifying interactions and the recipient in all but 18 (in 4 interactions neither approacher nor  
300 recipient could be identified confidently). The mean number of unique signals included per  
301 approach were 2.22 (SD = 1.47) for male-male approaches, 3.14 (SD = 2.23) for female-female  
302 approaches, 2.45 (SD = 1.72) for male-female approaches, and 1.84 (SD = 1.22) for female-male  
303 approaches when using the full ethogram.

304 Table 3.1: Counts of interaction types

| <b>Approacher sex</b> |               |             |
|-----------------------|---------------|-------------|
| <b>Recipient</b>      | <b>Female</b> | <b>Male</b> |
| Female                | 167           | 64          |
| Male                  | 73            | 37          |

305 **3.1 Male-male approaches - how do the chacma baboons compare?**

306 A total of 51 male-male interactions involving only adult/subadults were identified across all 65  
307 hours of footage. Of the 51 male-male proximity events, 43 can be considered “greetings”  
308 according to criteria applied in other studies (presence of lip-smacking, ear-flattening, physical  
309 contact, or prolonged eye contact or gaze towards) [1,2,27].

310 While Guinea baboons are certainly exceptional in terms of physical and intense physical  
311 contact, it does not appear that chacma baboons are an outlier when compared to the other  
312 COKY baboons (see table 3.2). Approximately 16.3% of chacma male baboon greetings  
313 involved physical contact (95% confidence interval from 5.2% to 27.1%) and 9.3% intense  
314 physical contact (95-CI: 0.5% to 18%), similarly to olive and hamadryas baboons. Reciprocity  
315 was also similar in the chacma baboon sample and previously reported hamadryas studies  
316 (estimate: 72.1%, 95-CI: 58.5% to 85.6%).

317 Table 3.2: Comparison of male greetings across baboon species

| <b>Species</b>            | <b>Contact</b> | <b>Intense</b> | <b>Reciprocal</b> |
|---------------------------|----------------|----------------|-------------------|
| <b>chacma (Gorongosa)</b> | <b>16.3%</b>   | <b>9.3%</b>    | <b>72.1%</b>      |
| yellow <sup>a</sup>       | N.A.           | N.A.           | N.A.              |



| <b>Species</b>         | <b>Contact</b> | <b>Intense</b> | <b>Reciprocal</b> |
|------------------------|----------------|----------------|-------------------|
| kinda <sup>b</sup>     | N.A.           | N.A.           | N.A.              |
| olive <sup>c</sup>     | rare           | rare           | N.A.              |
| hamadryas <sup>d</sup> | rare           | rare           | 71.4%             |
| Guinea <sup>e</sup>    | 93.4%          | 59.2%          | 81.9%             |

<sup>a</sup>low rate of greeting observed [9]; <sup>b</sup>no available data; <sup>c</sup>[46]; <sup>d</sup>[3, 47, 48, 65]; <sup>e</sup>[1, 2, 27]

### 318 **3.2 Community detection: Identification of signal combinations**

319 Community detection was completed with the larger ethogram (35 behaviours - results in  
320 supplementary information) and again with a minimized ethogram (25 behaviours). With the  
321 minimized ethogram, community detection identified four clusters with a modularity of 0.49  
322 (Figure 3.1). The first cluster included passing without contact and glancing toward the recipient;  
323 the second cluster contained observing the recipient, arriving (classified as an approach that ends  
324 in the individual stopping at and/or interacting with the recipient rather than diverting or passing  
325 without contact), non-aggressive physical contact, and presenting; the third consisted of  
326 observing the recipient's infant, having physical contact with the infant, and grunting; the fourth  
327 cluster consisted of lip-smacking and ear-flattening.

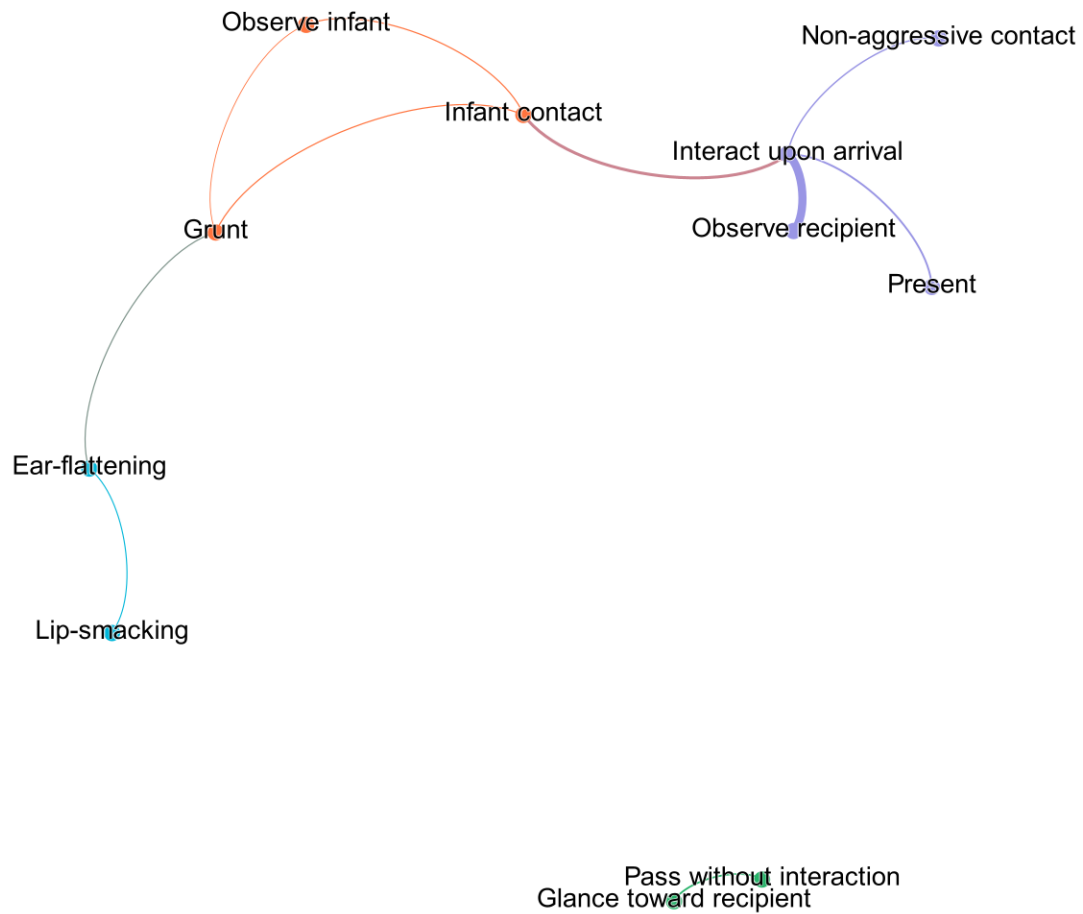

328

329 *Figure 3.1: Community detection across all greetings with a minimal ethogram. Linked and*  
330 *coloured behaviours are detected clusters, with edges labelled with the combination's observed*  
331 *probability. Figure created using Gephi.*

332 When the dataset was split into subsets by sex combination, clusters could be identified in each  
333 subset (see table 3.3, graphical results in supplementary materials). Due to the high number of  
334 female-female events, we expect community detection using only female-female events to be  
335 most similar to that using all events.

336 Table 3.3: Community detection results for sex combination subsets

| Sex Combination | Modularity | Clusters                                                                     |
|-----------------|------------|------------------------------------------------------------------------------|
| Female-female   | 0.38       | Pass without contact and glance toward                                       |
|                 |            | Observing infant, infant contact, and interacting upon arrival               |
| Male-male       | 0.50       | Lip-smacking, ear-flattening, grunting, and non-aggressive contact           |
|                 |            | Ear-flattening, interacting upon arrival, and observing during approach      |
| Female-male     | 0.32       | Grimace, present, and evasive movement                                       |
|                 |            | Passing without contact and glancing toward recipient                        |
| Male-female     | 0.42       | Observing, presenting, pausing during approach, and interacting upon arrival |
|                 |            | Observing, soliciting grooming, and interacting upon arrival                 |
| Male-female     | 0.42       | Ear-flattening and grunting                                                  |
|                 |            | Passing without contact and glancing toward recipient                        |

337 **3.3 A comparison of signal use in male versus female approachers and**  
338 **across sex combinations**

339 The five signals we aimed to compare included lip-smacking, ear-flattening, presenting,  
340 hindquarter contact, and mounting. However, due to limited occurrences and sample sizes once  
341 splitting by approacher sex and by sex combination, we did not include mounting when splitting  
342 by approacher sex or hindquarter contact and mounting when splitting by sex combination  
343 (fewer than 4 occurrences in male or male-male encounters respectively). Given the sample sizes  
344 and limited occurrences, we felt such comparisons would not be valid. However, the rarity of  
345 these behaviour indicates they may not play as significant of a role as in some other *Papio*  
346 species.

### 347 **3.3.1 Male versus female approachers**

348 When comparing observed probabilities in male approaches versus a boot-strapped sample of  
349 female approaches, we found males performed ear-flattening more than expected (probability =  
350 0.41, probability increase = 2.5, effect size = 0.25, specificity = 0.71,  $p < 0.001$ ). When doing the  
351 reverse, with observed probabilities in female approaches compared to boot-strapped male  
352 approaches, we found females exhibited more lip-smacking and presenting than expected (lip-  
353 smack: probability = 0.16, probability increase = 2.2, effect size = 0.09, specificity = 0.69;  
354 present: probability = 0.19, probability increase = 5.2, effect size = 0.15, specificity = 0.88;  $p <$   
355 0.001 for both). Pairings of the five behaviours (for example lip-smacking with hindquarter  
356 contact) were not more common than expected for either sex. While grunting was not part of the  
357 original list of signals being tested, a comparison of all signals showed that the combination of  
358 grunting together with lip-smacking had a particularly high probability increase of 32.2  
359 (probability = 0.08, effect size = 0.08,  $p < 0.001$ ) in female versus male approaches.

Observed vs expected probability in male (left) and female (right) approachers

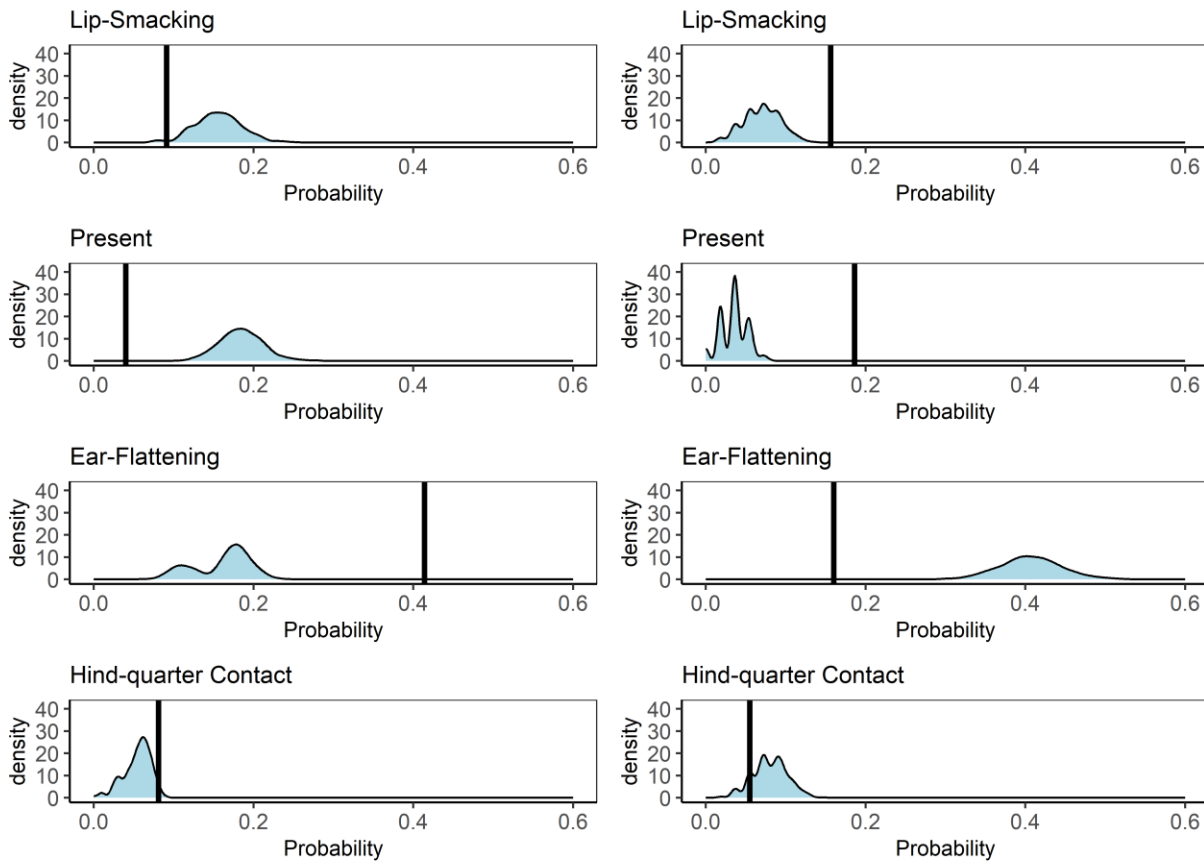

360

361 *Figure 3.2: The distribution of the expected probability of four behaviours during approach*  
362 *based on bootstrapped samples of the opposite sex's approach behaviours, with vertical lines*  
363 *representing the observed probabilities in the sex in question (male on left, female on right)*

364 **3.3.2 Across sex combinations**

365 **Male-Male:** Separate analysis of ear-flattening and lip-smacking indicate both occur more  
366 frequently than expected in approaches of male-male encounters when compared to a boot-  
367 strapped sample from all sex combinations, with ear-flattening having a probability increase of a  
368 factor of 2.6 and lip-smacking one of 1.8 (ear-flattening: probability = 0.53, effect size = 0.33,  
369 specificity = 0.49; lip-smacking: probability = 0.22, effect size = 0.1, specificity = 4.47

370 respectively,  $p < 0.001$  for both). While a comparison of all male approaches to all female  
371 approaches showed no significant difference in the use of the lip-smacking and ear-flattening  
372 together ( $p > 0.05$ ), a comparison of specifically male-male approaches to all sex combinations  
373 did find that the observed probability of ear-flattening and lip-smacking occurring in the same  
374 approach was higher than expected in male-male encounters (probability = 0.17, probability  
375 increase = 2.3, effect size = 0.1, specificity = 0.51,  $p < 0.001$ ).

376 ***Female-Female:*** In female-female encounters, lip-smacking had a higher observed probability  
377 than expected based on a boot-strapped sample of all sex combinations (probability = 0.22,  
378 probability increase = 3.4, effect size = 0.15, specificity = 0.43,  $p < 0.001$ ). In combinations of  
379 size two, ear-flattening with lip-smacking had an observed probability higher than expected  
380 (probability = 0.12, probability increase = 2.4, effect size = 0.07, specificity = 0.37,  $p < 0.001$ ).  
381 Though not the focus of this analysis, many combinations of infant directed behaviour, grunting,  
382 lip-smacking, and ear-flattening were also present significantly more than expected  
383 (supplementary information).

384 ***Female-Male:*** In female-male encounters, presenting had a higher observed probability than  
385 expected (probability = 0.41, probability increase = 6.3, effect size = 0.34, specificity = 0.70,  $p <$   
386  $0.001$ ). No size two combinations of the five relevant signals were observed more than expected.

387 ***Male-Female:*** In male-female encounters, ear-flattening was observed more than expected  
388 (probability = 0.35, probability increase = 1.68, effect size = 0.14, specificity = 0.35,  $p < 0.001$ ).  
389 No size two combinations of the five relevant signals were observed more than expected.

## 390 **4 Discussion**

391 Our study addresses three research themes: first, how chacma baboon behaviour fits into the  
392 baboon greeting literature; second, whether signals are reliably combined; and third, in what  
393 ways approach behaviour differs across sex combinations and the implications for studying  
394 male-male events in isolation. The rates of intense contact, any contact, and reciprocal greeting  
395 in chacma baboons are similar to those observed in olive and hamadryas baboons, indicating that  
396 they may not be as extreme of an outlier as suggested by existing literature [2]. We identified  
397 four clusters during community detection, suggesting that these signal combinations occur more  
398 frequently than expected. Our analyses of male versus female approach behaviour highlight both  
399 key differences and important areas of overlap, for example in the use of the ear-flattening and  
400 lip-smacking combination.

### 401 **4.1 Chacmas and the *Papio* genus**

402 It has been suggested that there is little to no male-male greeting in chacma baboons and that it is  
403 far less elaborate than those of other COKY baboons [10], but this impression may stem partly  
404 from a lack of research on greeting in the species. Across only 65 hours of footage, we identified  
405 43 “greetings,” some including hindquarter touches and even genital touching. While we cannot  
406 compare rate of greeting per hour, we found that 16% of greetings involved contact, 9% intense  
407 contact, and 72% are reciprocal. These align well with proportions seen in yellow, olive, and  
408 hamadryas baboons (see table 3.2). Dal Pesco & Fischer suggested that male-male greeting  
409 behaviour in baboons follows a geographic cline in elaboration and ritualization, with a large  
410 phylogenetic split between the southern (chacma, yellow, and kinda baboon) versus northern

411 (olive, hamadryas, Guinea baboon) clades [2]. They point out that species where males are more  
412 spatially tolerant and affiliative also have the highest rates of greeting and most ritualized  
413 greeting behaviour, supporting suggested connections between human prosociality, larger group  
414 living, and the evolution of ritual. Guinea baboons are the noticeable outlier when it comes to  
415 male-male greetings, with a particularly high hourly rate, 93.4% of all greetings involving  
416 contact, and 59.2% involving intense physical contact; they also demonstrate high levels of  
417 male-male spatial tolerance, affiliative behaviour, and the lowest, though comparable, level of  
418 sexual dimorphism in *Papio* [1].

419 Existing research on greeting in chacma baboons is limited, with early studies by Saayman and  
420 Hall reporting limited presenting and contact behaviour between males [42,50]. At odds with the  
421 remaining chacma literature, Saayman does report limited male-male coalitionary behaviour,  
422 suggesting there may be within-species variation in male cooperative behaviour [42]. Kalbitzer  
423 et al. approached the study of greeting behaviour using a similar format as here, recording all  
424 approaches within one meter, and reported limited physical greeting among chacma baboons in  
425 the Moremi Game Reserve, Botswana [10]. They recorded interactions as greetings only when  
426 non-agonistic contact and non-affiliative contact occurred (i.e., an approach in swaggering gate  
427 with lip-smacking and the come-hither face would not be considered a greeting, unlike in other  
428 greeting studies), finding that greetings occurred in about 7% of close proximity approaches  
429 (calculated from supplementary material [10]). The comparable rate for the Gorongosa baboons  
430 is 14%. The observed percentage of Moremi Game Reserve male-male encounters involving  
431 contact falls within our calculated 95% confidence interval (4% to 23%).



432 Importantly, chacma baboon male-male greeting behaviour appears to align broadly with that of  
433 the other COKY baboons. This could mean that (a) their lack of coalition formation is a derived  
434 characteristic and that while greetings may function to test cooperative potential in other species  
435 they serve a different function in chacma baboons or are a vestigial behaviour, (b) that both  
436 coalitionary and greeting behaviour is present to some degree in chacma baboons but has been  
437 underestimated and understudied, (c) that greetings reflect a different aspect of relationship  
438 quality which may in turn be correlated with cooperation in some but not all *Papio* species, or (c)  
439 that the function of greeting behaviour has diverged across the *Papio* genus, but that a base level  
440 of ritualized greeting is present across the genus and is likely ancestral. Gorongosa falls in a  
441 possible hybridization zone between yellow baboons and northern chacma baboons, so we may  
442 expect to see a cline in behaviour similar to the observed cline in morphology [59]. Further  
443 systematic study of chacma baboon troops at different distances from the hybridization zone  
444 would identify potential effects of hybridization. Gorongosa National Park provides the ideal  
445 study site for such work, with 200 troops spread across 3770 km<sup>2</sup>. Our study's sample size  
446 prevents further in-depth comparison with other *Papio* species but does suggest that further  
447 research on greeting in southern clade baboons, and particularly in chacma baboons, is  
448 warranted.

## 449 **4.2 Signal use and combinations**

450 Through community detection, we identified four clusters of signals that occur together more  
451 than expected. The first includes short glances towards the recipient and passing by the recipient  
452 without contact or interaction. The second includes observing the recipient, presenting, non-  
453 aggressive contact, and arriving and interacting with the recipient upon approach. The third

454 cluster includes observing the recipient's infant, having physical contact with the infant, and  
455 grunting. Cluster four consists of lip-smacking and ear-flattening. Clusters two and three, and  
456 three and four, are connected, with parts of this larger connected network appearing very similar  
457 to clusters identified when analysing female-female events separately, suggesting that these  
458 clusters may be highly related to female-female approaches involving infant contact. The cluster  
459 of presenting, interacting upon arrival, and observing during the approach is likely driven by the  
460 female-male interactions as it is also detected in this data subset.

461 The clustering of grunting, infant observation, and infant contact replicates findings of grunting  
462 studies across several baboon species, where approachers are found to grunt more when a  
463 recipient's infant is present, possibly as a way of signalling "benign intent" [6,7,51,53]. The  
464 juxtaposition of the use of prolonged gaze during approaches that result in interaction (cluster 2)  
465 versus the use of short glances during approaches that result in passing by without interaction  
466 (cluster 1) suggest that continued observation of the recipient is a potential indicator of intention  
467 to interact directly or may be a by-product of the approacher spending time assessing the  
468 recipient and context. Cluster 1 (glance toward and pass without contact) appears to be largely  
469 driven by female-female, female-male, and male-female interactions interactions, and cluster 2  
470 (arrive and observe during approach) by male-male, male-female and female-male interactions.  
471 It is possible that cluster 1 was not identified in male-male interactions due to the limited sample  
472 size, and that cluster 2 was masked in female-female interactions by the high proportion of  
473 infant-centered interactions. Gaze direction and length are likely associated with the outcome of  
474 interactions across all sex combinations. Even if direct gaze does not serve as an intentional  
475 signal, primates are generally adept at identifying when they are being looked at, suggesting that  
476 direct gaze of an approacher will always serve to transmit information, even if unintentionally

477 [73–75]. The lack of further stereotypical combinations indicates there is significant flexibility in  
478 how signals are combined and that approach behaviour in chacma baboons likely cannot be  
479 considered “ritualized” [29].

#### 480 **4.2.1 Ear-flattening and lip-smacking**

481 The fourth cluster - lip-smacking and ear-flattening – appears to be driven by both female-female  
482 and male-male encounters, according to the observed probability of this signal combination in  
483 these sex combinations compared to other sex combinations. The “come hither” or “NEEF” face,  
484 which consists of ear-flattening and scalp retraction, is frequently referred to as an affiliative  
485 signal in the baboon literature [8,46,76]. When comparing between male and female approachers  
486 more generally, rather than splitting further by recipient sex, we find females have a higher  
487 probability of performing lip-smacking and males of performing ear-flattening. This indicates  
488 that signalling is very clearly affected not only by the sex of the approacher, but also by the sex  
489 of the recipient. The combination of lip-smacking and ear-flattening together may be a  
490 particularly strong signal of benign intent (male-male encounters can be particularly risky and  
491 female-female interactions often involve attempted infant contact), used when a particular  
492 outcome, for example physical contact, is desired. The clustering of the lip-smacking and ear-  
493 flattening combination together with non-aggressive contact in female-female interactions  
494 supports this interpretation. Ear-flattening may be more easily identifiable when observing male  
495 than female approachers, but the differences in usage of lips-smacking in male-male approaches  
496 and female-female approaches versus all sex combinations could not be explained by this.

497 Lip-smacking is exhibited by multiple primate species and has been found to be positively  
498 associated with affiliative behaviours [54,77,78]. It is one of the most common gestures observed

499 in baboons and is used across a wide variety of contexts [79]. How lip-smacking is combined  
500 with other signals influences the outcome of following interactions. In crested macaques, contact  
501 after lip-smacking was found to vary based on the signals lip-smacking was combined with,  
502 though ear flattening had neither a positive nor negative impact [54]. In chimpanzees, grooming  
503 solicitations accompanied by lip-smacking resulted in longer grooming bouts with higher  
504 probabilities of reciprocity [78]. Our results indicate that the signals lip-smacking is combined  
505 with may also play an important role in baboons and lays the ideal groundwork for further work  
506 investigating the outcomes and potential goals of the identified signal clusters.

507 Similar studies conducted across multiple baboon populations would help determine whether  
508 sex-based differences in signal use and combination are consistent within and between species.  
509 Using a network-based approach allows for a deeper understanding of the co-occurrence of  
510 signals, helping us identify combinations used in specific approach contexts. This approach  
511 provides further insight into how combining signals may modify meaning beyond the simple  
512 sum of the signals' individual meanings.

### 513 **4.3 Conclusions**

514 Our results suggest that chacma baboon greeting behaviour aligns with that of the other COKY  
515 baboons. Males show some contact behaviour during approaches towards other males, along  
516 with many of the other reported greeting behaviours, but it is relatively rare in comparison to  
517 Guinea and hamadryas baboons. Within chacma baboons, our comparison of male versus female  
518 approaches suggests ear-flattening is used more frequently by males, lip-smacking and  
519 presenting by females, and the combination of ear-flattening with lip-smacking is particularly  
520 common in male-male and female-female encounters in comparison to other sex combinations.

521 Community detection identified several clusters of signals that co-occur and provides insight into  
522 which sex combination approaches are driving the presence of each cluster. The connection  
523 between lip-smacking and ear-flattening appears to be particularly relevant to encounters where  
524 signalling benign intent may be especially necessary, providing a promising direction for future  
525 research.

526 It is time for a widening of the study of baboon greetings, expanding past the traditional focus on  
527 male-male encounters and considering approach behaviour more broadly. Including all proximity  
528 events, rather than just instances where individuals “greeted” provides a more encompassing  
529 view of approach behaviour and prevents omission of potentially useful information. This  
530 approach will allow for more fine-tuned testing of the functions of approach behaviours;  
531 knowing in which contexts interactions do not happen during an approach may be just as  
532 valuable as knowing in which cases they do. This study provides an example of how widening  
533 the methodological framework and using alternative analytical methods, for example network  
534 analysis, can give us new insight into the specificity, context, and function of individual  
535 behaviours and allow us to identify behaviour clusters used together in a robust way.

## 536 **5 Acknowledgements**

537 The authors would like to thank collaborator Lucy Baehren, who permitted use of video footage  
538 she recorded in Gorongosa National Park, and the staff of Gorongosa National Park for making  
539 this research possible, especially Marc Stalmans, Jason Denlinger, and all rangers who worked  
540 with us in the field, including Ernesto Xavier and Sérgio Joao Amaral. The authors are most  
541 grateful for the vision of Greg Carr and support of the Gorongosa Restoration Project. This work

542 was supported by grant funding from the Boise Trust Fund administered by the Oxford  
543 University Department of Zoology and the Owen Aldis Scholarship awarded by the International  
544 Society for Human Ethology. Further financial support for fieldwork was provided by St John's  
545 College, University of Oxford and by the Clarendon Fund, University of Oxford.

## 546 **Bibliography**

- 547 1. Dal Pesco F, Fischer J. 2018 Greetings in male Guinea baboons and the function of  
548 rituals in complex social groups. *Journal of Human Evolution* **125**, 87–98.  
549 (doi:[10.1016/j.jhevol.2018.10.007](https://doi.org/10.1016/j.jhevol.2018.10.007))
- 550 2. Dal Pesco F, Fischer J. 2020 On the evolution of baboon greeting rituals. *Philosophical*  
551 *Transactions of the Royal Society B* **375**. (doi:[10.1098/rstb.2019.0420](https://doi.org/10.1098/rstb.2019.0420))
- 552 3. Colmenares F. 1990 Greeting behaviour in male baboons, I: Communication, reciprocity  
553 and symmetry. *Behaviour* **113**, 81–116.
- 554 4. Mondada L, Meguerditchian A. 2022 Sequence organization and embodied mutual  
555 orientations: Openings of social interactions between baboons. *Philosophical Transactions of the*  
556 *Royal Society B: Biological Sciences* **377**, 20210101. (doi:[10.1098/rstb.2021.0101](https://doi.org/10.1098/rstb.2021.0101))
- 557 5. Cheney DL, Seyfarth RM, Silk JB. 1995 The role of grunts in reconciling opponents and  
558 facilitating interactions among adult female baboons. *Animal Behaviour* **50**, 249–257.
- 559 6. Silk JB, Seyfarth RM, Cheney DL. 2016 Strategic use of affiliative vocalizations by wild  
560 female baboons. *PLOS ONE* **11**. (doi:[10.1371/journal.pone.0163978](https://doi.org/10.1371/journal.pone.0163978))

- 561 7. Rendall D, Seyfarth RM, Cheney DL, Owren MJ. 1999 [The meaning and function of](#)  
562 [grunt variants in baboons](#). *Animal Behaviour* **57**, 583–592.
- 563 8. Smuts BB. 1985 *Sex and friendship in baboons*. London: Transaction Publishers.
- 564 9. Hausfater G, Takacs D. 1987 Structure and function of hindquarter presentations in  
565 yellow baboons (*Papio cynocephalus*). *Ethology* **74**, 297–319. (doi:[10.1111/j.1439-](https://doi.org/10.1111/j.1439-0310.1987.tb00941.x)  
566 [0310.1987.tb00941.x](https://doi.org/10.1111/j.1439-0310.1987.tb00941.x))
- 567 10. Kalbitzer U, Heistermann M, Cheney DL, Seyfarth RM, Fischer J. 2015 Social behavior  
568 and patterns of testosterone and glucocorticoid levels differ between male chacma and Guinea  
569 baboons. *Hormones and Behavior* **75**, 100–110. (doi:[10.1016/j.yhbeh.2015.08.013](https://doi.org/10.1016/j.yhbeh.2015.08.013))
- 570 11. Fedurek P, Neumann C, Bouquet Y, Mercier S, Magris M, Quintero F, Zuberbühler K.  
571 2019 Behavioural patterns of vocal greeting production in four primate species. *Royal Society*  
572 *Open Science* **6**. (doi:[10.1098/rsos.182181](https://doi.org/10.1098/rsos.182181))
- 573 12. Rodrigues ED, Santos AJ, Hayashi M, Matsuzawa T, Hobaiter C. 2022 Exploring  
574 greetings and leave-takings: Communication during arrivals and departures by chimpanzees of  
575 the Bossou community, Guinea. *Primates* **63**, 443–461. (doi:[10.1007/s10329-021-00957-z](https://doi.org/10.1007/s10329-021-00957-z))
- 576 13. Corewyn LC, Setchell JM. 2019 Greeting behaviors in male *Alouatta palliata* at La  
577 Pacifica, Costa Rica. *International Journal of Primatology* **40**, 630–646. (doi:[10.1007/s10764-](https://doi.org/10.1007/s10764-019-00109-7)  
578 [019-00109-7](https://doi.org/10.1007/s10764-019-00109-7))

- 579 14. De Marco A, Cozzolino R, Dessì-Fulgheri F, Thierry B. 2011 Collective arousal when  
580 reuniting after temporary separation in Tonkean macaques. *American Journal of Physical*  
581 *Anthropology* **146**, 457–464. (doi:[10.1002/ajpa.21606](https://doi.org/10.1002/ajpa.21606))
- 582 15. Dias PAD, Luna ER, Espinosa DC. 2008 The functions of the "greeting ceremony"  
583 among male mantled howlers (*Alouatta palliata*) on Agaltepec Island, Mexico. *American*  
584 *Journal of Primatology* **70**, 621–628. (doi:[10.1002/ajp.20535](https://doi.org/10.1002/ajp.20535))
- 585 16. Heesen R *et al.* 2021 Assessing joint commitment as a process in great apes. *iScience* **24**.  
586 (doi:[10.1016/J.ISCI.2021.102872](https://doi.org/10.1016/J.ISCI.2021.102872))
- 587 17. Kutsukake N, Suetsugu N, Hasegawa T. 2006 Pattern, distribution, and function of  
588 greeting behavior among black-and-white colobus. *International Journal of Primatology* **27**.  
589 (doi:[10.1007/s10764-006-9072-x](https://doi.org/10.1007/s10764-006-9072-x))
- 590 18. Laporte MNC, Zuberbühler K. 2010 Vocal greeting behaviour in wild chimpanzee  
591 females. *Animal Behaviour* **80**, 467–473. (doi:[10.1016/J.ANBEHAV.2010.06.005](https://doi.org/10.1016/J.ANBEHAV.2010.06.005))
- 592 19. Luef EM, Pika S. 2017 Reciprocal greeting in chimpanzees (*Pan troglodytes*) at the  
593 ngogo community. *Journal of Neurolinguistics* **43**, 263–273.  
594 (doi:[10.1016/J.JNEUROLING.2016.11.002](https://doi.org/10.1016/J.JNEUROLING.2016.11.002))
- 595 20. Luef EM, Pika ·S. 2019 Social relationships and greetings in wild chimpanzees (*Pan*  
596 *troglodytes*): Use of signal combinations. *Primates* **60**, 507–515. (doi:[10.1007/s10329-019-](https://doi.org/10.1007/s10329-019-00758-5)  
597 [00758-5](https://doi.org/10.1007/s10329-019-00758-5))



- 598 21. Okamoto K, Agetsuma N, Kojima S. 2001 Greeting behavior during party encounters in  
599 captive chimpanzees. *Primates* **42**, 161–165. (doi:[10.1007/BF02558143](https://doi.org/10.1007/BF02558143))
- 600 22. Nakamura M. 2022 Greetings among female chimpanzees in Mahale, Tanzania.  
601 *American Journal of Primatology* **n/a**, e23417. (doi:[10.1002/ajp.23417](https://doi.org/10.1002/ajp.23417))
- 602 23. Schaffner CM, Aureli F. 2005 Embraces and grooming in captive spider monkeys.  
603 *International Journal of Primatology* **26**. (doi:[10.1007/s10764-005-6460-6](https://doi.org/10.1007/s10764-005-6460-6))
- 604 24. Scheumann M, Linn S, Zimmermann E. 2017 Vocal greeting during mother-infant  
605 reunions in a nocturnal primate, the gray mouse lemur (*Microcebus murinus*). *Scientific Reports*  
606 **7**, 1–7. (doi:[10.1038/s41598-017-10417-8](https://doi.org/10.1038/s41598-017-10417-8))
- 607 25. de Waal FBM, Roosmalen A van. 1979 Reconciliation and consolation among  
608 chimpanzees. *Behavioral Ecology and Sociobiology* **5**, 55–66. (doi:[10.1007/BF00302695](https://doi.org/10.1007/BF00302695))
- 609 26. Kavanagh E *et al.* 2021 Dominance style is a key predictor of vocal use and evolution  
610 across nonhuman primates. *Royal Society Open Science* **8**, 210873. (doi:[10.1098/rsos.210873](https://doi.org/10.1098/rsos.210873))
- 611 27. Whitham JC, Maestriperi D. 2003 Primate rituals: The function of greetings between  
612 male Guinea baboons. *Ethology* **109**, 847–859. (doi:[10.1046/j.0179-1613.2003.00922.x](https://doi.org/10.1046/j.0179-1613.2003.00922.x))
- 613 28. Maestriperi D. 2005 Gestural communication in three species of macaques (*Macaca*  
614 *mulatta*, *M. nemestrina*, *M. arctoides*): Use of signals in relation to dominance and social  
615 context. *Gesture* **5**, 57–73.
- 616 29. Rossano MJ. 2012 The essential role of ritual in the transmission and reinforcement of  
617 social norms. *Psychological Bulletin* **138**, 529–549. (doi:[10.1037/a0027038](https://doi.org/10.1037/a0027038))

- 618 30. Whitehouse H, Lanman JA. 2014 The ties that bind us: Ritual, fusion, and identification.  
619 *Current Anthropology* **55**. (doi:[10.1086/678698](https://doi.org/10.1086/678698))
- 620 31. Rossano MJ. 2015 The evolutionary emergence of costly rituals. *PaleoAnthropology*, 78–  
621 100. (doi:[10.4207/PA.2015.ART97](https://doi.org/10.4207/PA.2015.ART97))
- 622 32. Bobe R, Coelho J, Carvalho S, Leakey M. 2022 Early hominins and paleoecology of the  
623 Koobi Fora Formation, Lake Turkana Basin, Kenya. In *African paleoecology and human*  
624 *evolution* (ed SC Reynolds), pp. 311–331. Cambridge: Cambridge University Press.
- 625 33. Roos C, Knauf S, Chuma IS, Maille A, Callou C, Sabin R, Portela Miguez R, Zinner D.  
626 2021 New mitogenomic lineages in *Papio* baboons and their phylogeographic implications.  
627 *American Journal of Physical Anthropology* **174**, 407–417. (doi:[10.1002/AJPA.24186](https://doi.org/10.1002/AJPA.24186))
- 628 34. Zinner D, Wertheimer J, Liedigk R, Groeneveld LF, Roos C. 2013 Baboon phylogeny as  
629 inferred from complete mitochondrial genomes. *American Journal of Physical Anthropology*  
630 **150**, 133–140. (doi:[10.1002/ajpa.22185](https://doi.org/10.1002/ajpa.22185))
- 631 35. Ey E, Rahn C, Hammerschmidt K, Fischer J. 2009 Wild female olive baboons adapt their  
632 grunt vocalizations to environmental conditions. *Ethology* **115**, 493–503.
- 633 36. Graham KE, Badihi G, Safryghin A, Grund C, Hobaiter C. 2022 A socio-ecological  
634 perspective on the gestural communication of great ape species, individuals, and social units.  
635 *Ethology Ecology & Evolution* **34**, 235–259. (doi:[10.1080/03949370.2021.1988722](https://doi.org/10.1080/03949370.2021.1988722))

- 636 37. Jolly CJ, Phillips-Conroy JE. 2006 Testicular size, developmental trajectories, and male  
637 life history strategies in four baboon taxa. In *Reproduction and fitness in baboons: Behavioral,*  
638 *ecological, and life history perspectives* (eds L Swedell, SR Leigh), pp. 257–275. Springer.
- 639 38. Plavcan JM, Ruff CB. 2008 Canine size, shape, and bending strength in primates and  
640 carnivores. **84**, 65–84. (doi:[10.1002/ajpa.20779](https://doi.org/10.1002/ajpa.20779))
- 641 39. Thorén S, Lindenfors P, Kappeler PM. 2006 Phylogenetic analyses of dimorphism in  
642 primates: Evidence for stronger selection on canine size than on body size. *American Journal of*  
643 *Physical Anthropology* **130**, 50–59. (doi:[10.1002/ajpa.20321](https://doi.org/10.1002/ajpa.20321))
- 644 40. Henzi SP, Barrett L. 2003 Evolutionary ecology, sexual conflict, and behavioral  
645 differentiation among baboon populations. *Evolutionary Anthropology* **12**, 217–230.  
646 (doi:[10.1002/evan.10121](https://doi.org/10.1002/evan.10121))
- 647 41. Henzi SP, Barrett L. 2005 The historical socioecology of savanna baboons (*Papio*  
648 *hamadryas*). *Journal of Zoology* **265**, 215–226. (doi:[10.1017/S0952836904006399](https://doi.org/10.1017/S0952836904006399))
- 649 42. Saayman GS. 1971 Behaviour of the adult males in a troop of free-ranging chacma  
650 baboons (*Papio ursinus*). *Folia Primatologica* **15**, 36–57.
- 651 43. Fischer J *et al.* 2017 Charting the neglected West: The social system of Guinea baboons.  
652 (doi:[10.1002/ajpa.23144](https://doi.org/10.1002/ajpa.23144))
- 653 44. Kummer H. 1984 From laboratory to desert and back: A social system of hamadryas  
654 baboons. *Animal Behaviour* **32**, 965–971. (doi:[10.1016/S0003-3472\(84\)80208-0](https://doi.org/10.1016/S0003-3472(84)80208-0))

- 655 45. Patzelt A, Kopp GH, Ndao I, Kalbitzer U, Zinner D, Fischer J. 2014 Male tolerance and  
656 male male bonds in a multilevel primate society. *Proceedings of the National Academy of*  
657 *Sciences* **111**, 14740–14745. (doi:[10.1073/pnas.1405811111](https://doi.org/10.1073/pnas.1405811111))
- 658 46. Smuts BB, Watanabe JM. 1990 Social relationships and ritualized greetings in adult male  
659 baboons (*Papio cynocephalus anubis*). *International Journal of Primatology* **11**, 147–.
- 660 47. Fraser Ó, Plowman AB. 2007 Function of notification in *Papio hamadryas*. *International*  
661 *Journal of Primatology* **28**, 1439–1448. (doi:[10.1007/s10764-007-9185-x](https://doi.org/10.1007/s10764-007-9185-x))
- 662 48. Colmenares F. 1991 Greeting, aggression, and coalitions between male baboons:  
663 Demographic correlates. *Primates* **32**, 453. (doi:[10.1007/BF02381936](https://doi.org/10.1007/BF02381936))
- 664 49. Henzi SP, Clarke PMR, Barrett L, Noë R, Jolly CJ. 2008 Cooperation and coalition  
665 formation in humans and primates: The genetics and biogeography of coalition formation in  
666 savanna baboons.
- 667 50. Hall KRL. 1962 The sexual, agonistic and derived social behaviour patterns of the wild  
668 chacma baboon, *Papio Ursinus*. *Proceedings of the Zoological Society of London* **139**, 283–327.  
669 (doi:[10.1111/j.1469-7998.1962.tb01831.x](https://doi.org/10.1111/j.1469-7998.1962.tb01831.x))
- 670 51. Silk JB, Roberts ER, Städele V, Strum SC. 2018 To grunt or not to grunt: Factors  
671 governing call production in female olive baboons, *Papio anubis*. *PLOS ONE* **13**.  
672 (doi:[10.1371/journal.pone.0204601](https://doi.org/10.1371/journal.pone.0204601))
- 673 52. Cheney DL, Seyfarth RM. 1997 Reconciliatory grunts by dominant female baboons  
674 influence victims' behaviour. *Animal Behaviour* **54**, 409–418. (doi:[10.1006/anbe.1996.0438](https://doi.org/10.1006/anbe.1996.0438))

- 675 53. Faraut L, Siviter H, Dal Pesco F, Fischer J. 2019 How life in a tolerant society affects the  
676 usage of grunts: Evidence from female and male Guinea baboons. *Animal Behaviour* **153**, 83–93.  
677 (doi:[10.1016/j.anbehav.2019.05.003](https://doi.org/10.1016/j.anbehav.2019.05.003))
- 678 54. Micheletta J, Engelhardt A, Matthews L, Agil M, Waller BM. 2013 Multicomponent and  
679 multimodal lipsmacking in crested macaques (*Macaca nigra*). *American Journal of Primatology*  
680 **75**, 763–773. (doi:[10.1002/ajp.22105](https://doi.org/10.1002/ajp.22105))
- 681 55. Mielke A, Waller BM, Pérez C, Rincon AV, Duboscq J, Micheletta J. 2021 NetFACS:  
682 Using network science to understand facial communication systems. *Behavior Research Methods*  
683 (doi:[10.3758/s13428-021-01692-5](https://doi.org/10.3758/s13428-021-01692-5))
- 684 56. Aychet J, Blois-Heulin C, Lemasson A. 2021 Sequential and network analyses to  
685 describe multiple signal use in captive mangabeys. *Animal Behaviour* **182**, 203–226.  
686 (doi:[10.1016/j.anbehav.2021.09.005](https://doi.org/10.1016/j.anbehav.2021.09.005))
- 687 57. Bobe R *et al.* 2021 The first Miocene fossils from coastal woodlands in the southern East  
688 African Rift. *bioRxiv* (doi:[10.1101/2021.12.16.472914](https://doi.org/10.1101/2021.12.16.472914))
- 689 58. Macgregor D. 2015 History of the development of the East African Rift System: A series  
690 of interpreted maps through time. *Journal of African Earth Sciences* **101**, 232–252.  
691 (doi:[10.1016/j.jafrearsci.2014.09.016](https://doi.org/10.1016/j.jafrearsci.2014.09.016))
- 692 59. Martinez FI *et al.* 2019 A missing piece of the *Papio* puzzle: Gorongosa baboon  
693 phenostructure and intrageneric relationships. *Journal of Human Evolution* **130**, 1–20.  
694 (doi:[10.1016/j.jhevol.2019.01.007](https://doi.org/10.1016/j.jhevol.2019.01.007))

- 695 60. Tinley KL. 1977 Framework of the Gorongosa ecosystem. PhD thesis.
- 696 61. Habermann JM *et al.* 2018 Gorongosa by the sea: First Miocene fossil sites from the  
697 Urema Rift, central Mozambique, and their coastal paleoenvironmental and paleoecological  
698 contexts. *Palaeogeography, Palaeoclimatology, Palaeoecology*
- 699 62. Stalmans M, Beilfuss R. 2008 Landscapes of the Gorongosa National Park.
- 700 63. Hammond P, Lewis-Bevan L, Biro D, Carvalho S. 2022 Risk perception and terrestriality  
701 in primates: A quasi-experiment through habituation of chacma baboons (*Papio ursinus*) in  
702 Gorongosa National Park, Mozambique. *American Journal of Biological Anthropology* **179**, 48–  
703 59. (doi:[10.1002/ajpa.24567](https://doi.org/10.1002/ajpa.24567))
- 704 64. Baehren L, Carvalho S. 2022 Yet another non-unique human behaviour: Leave-taking in  
705 wild chacma baboons (*Papio ursinus*). *Animals* **12**, 2577. (doi:[10.3390/ani12192577](https://doi.org/10.3390/ani12192577))
- 706 65. Colmenares F. 1991 Greeting behaviour between male baboons: Oestrous females,  
707 rivalry and negotiation. *Animal Behaviour* **41**, 49–60.
- 708 66. Silk JB. 2013 *CABS Project Research Protocol Guide*. Uaso Ngiri Baboon Project.
- 709 67. Muschinski J, Carvalho S. 2022 *Papio ursinus approach behaviour ethogram, Gorongosa*  
710 *National Park, Mozambique*. 1st edn. Gorongosa National Park, Sofala, Mozambique: Paleo-  
711 Primate Project, Gorongosa National Park. (doi:[10.5281/zenodo.7314291](https://doi.org/10.5281/zenodo.7314291))
- 712 68. Muschinski J, Carvalho S. 2022 Chacma baboon approach behaviour dataset, Gorongosa  
713 National Park, Mozambique. (doi:[10.5281/zenodo.7330446](https://doi.org/10.5281/zenodo.7330446))

- 714 69. Friard O, Gamba M. 2016 BORIS: A free, versatile open-source event-logging software  
715 for video/audio coding and live observations. *Methods in Ecology and Evolution* **7**, 1325–1330.  
716 (doi:[10.1111/2041-210X.12584](https://doi.org/10.1111/2041-210X.12584))
- 717 70. Silge J, Robinson D. 2017 *Text Mining with R: A Tidy Approach*. O’Reilly Media. See  
718 <https://www.tidytextmining.com/>.
- 719 71. Canty A, Ripley B. 2016 *Package 'boot'*. CRAN. See  
720 <https://cran.microsoft.com/snapshot/2016-04-15/web/packages/boot/boot.pdf>.
- 721 72. Newman MEJ. 2004 Fast algorithm for detecting community structure in networks.  
722 *Physical Review E* **69**, 066133. (doi:[10.1103/PhysRevE.69.066133](https://doi.org/10.1103/PhysRevE.69.066133))
- 723 73. Bourjade M, Meguerditchian A, Maille A, Gaunet F, Vauclair J. 2014 Olive baboons,  
724 *Papio anubis*, adjust their visual and auditory intentional gestures to the visual attention of  
725 others. *Animal Behaviour* **87**, 121–128. (doi:[10.1016/J.ANBEHAV.2013.10.019](https://doi.org/10.1016/J.ANBEHAV.2013.10.019))
- 726 74. Emery NJ. 2000 The eyes have it: The neuroethology, function and evolution of social  
727 gaze. *Neuroscience and Biobehavioral Reviews* **24**, 581–604.
- 728 75. Harrod EG, Coe CL, Niedenthal PM. 2020 Social structure predicts eye contact tolerance  
729 in nonhuman primates: Evidence from a crowd-sourcing approach. *Scientific Reports*, 1–9.  
730 (doi:[10.1038/s41598-020-63884-x](https://doi.org/10.1038/s41598-020-63884-x))
- 731 76. Smuts BB. 2002 Gestural communication in olive baboons and domestic dogs. In *The*  
732 *cognitive animal* (eds M Bekoff, C Allen, GM Burghardt), pp. 301–306. London: The MIT  
733 Press.

- 734 77. Easley SP, Coelho AM. 1991 Is lipsmacking an indicator of social status in baboons?  
735 *Folia Primatologica* **56**, 190–201. (doi:[10.1159/000156547](https://doi.org/10.1159/000156547))
- 736 78. Fedurek P, Slocombe KE, Hartel JA, Zuberbühler K. 2015 Chimpanzee lip-smacking  
737 facilitates cooperative behaviour. *Scientific Reports* **5**, 13460. (doi:[10.1038/srep13460](https://doi.org/10.1038/srep13460))
- 738 79. Molesti S, Meguerditchian A, Bourjade M. 2020 Gestural communication in olive  
739 baboons (*Papio anubis*): repertoire and intentionality. *Animal Cognition* **23**, 19–40.  
740 (doi:[10.1007/s10071-019-01312-y](https://doi.org/10.1007/s10071-019-01312-y))
- 741 80. Rogers J *et al.* 2019 [The comparative genomics and complex population history of \*Papio\*](#)  
742 [baboons](#). *Science Advances* **5**.
- 743 81. Petersdorf M, Weyher AH, Kamilar JM, Dubuc C, Higham JP. 2019 Sexual selection in  
744 the Kinda baboon. *Journal of Human Evolution* **135**, 102635. (doi:[10.1016/j.jhevol.2019.06.006](https://doi.org/10.1016/j.jhevol.2019.06.006))
- 745 82. Swedell L, Saunders J, Schreier A, Davis B, Tesfaye T, Pines M. 2011 Female  
746 “dispersal” in hamadryas baboons: Transfer among social units in a multilevel society. *American*  
747 *Journal of Physical Anthropology* **145**, 360–370. (doi:[10.1002/ajpa.21504](https://doi.org/10.1002/ajpa.21504))
- 748 83. Henzi SP, Weingrill T, Barretta L. 1999 Male behaviour and the evolutionary ecology of  
749 chacma baboons. *South African Journal of Science* **95**, 240–242.
- 750 84. Pelaez F. 1982 Greeting movements among adult males in a colony of baboons: *Papio*  
751 *hamadryas*, *P. cynocephalus* and their hybrids. *Primates* **23**, 233–244.
